# Supplementary material for: Ubiquitome analysis reveals the involvement of lysine ubiquitination in the spermatogenesis process of adult buffalo (Bubalus bubalis) testis
Source: PubMed Central journal article supplement (PMC7298129; doi:10.1042/bsr20193537), 2020-06-16
Supplement: BSR-2019-3537_supp.pdf [file BSR-2019-3537_supp.pdf]

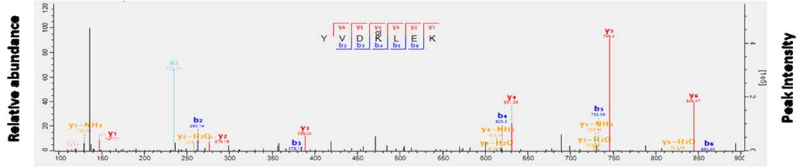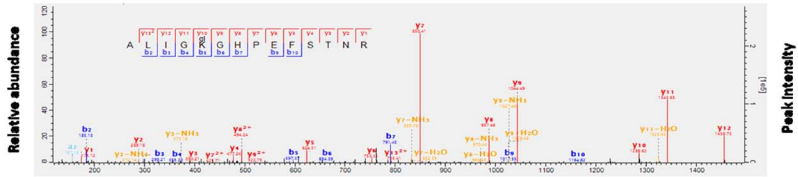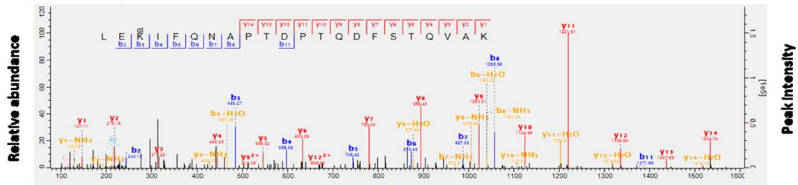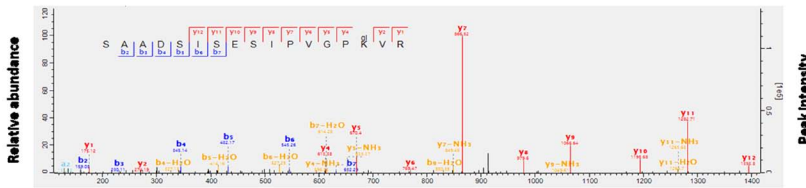

**Supplementary Fig.S1. The MS/MS spectra of the representative ubiquitinated peptides from ubiquitin carboxyl-terminal hydrolase (USP5).** The spectra are shown for ubiquitination sites of K357, K423, K360 and K793, respectively, and their peptide sequences are shown in the respective spectrum.

**Buffalo testis**

**MUbiSiDa**

**206**

**216**

**882**

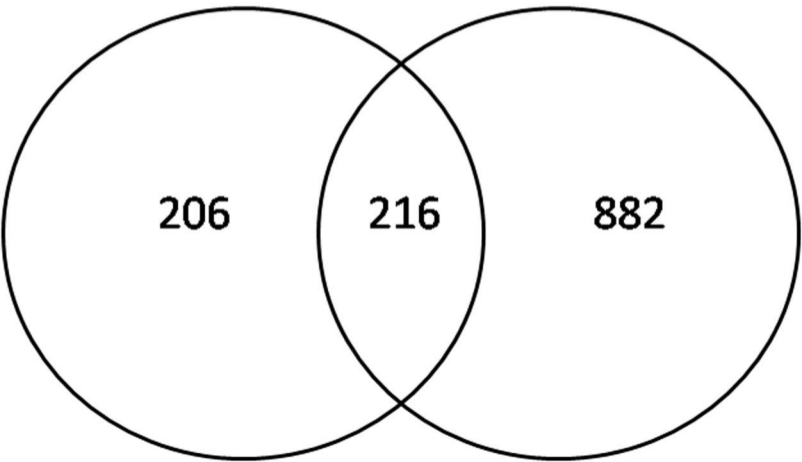

**Supplementary Fig.S2.** The Venn diagram for ubiquitination sites of buffalo testis compared to the mUbiSiDa database.

**PROTEASOME**

Capture polyubiquitinated proteins

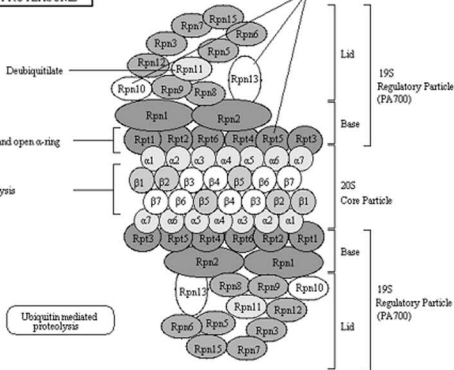

PA700-20S-PA700  
(26S proteasome)

**Regulatory Particles**

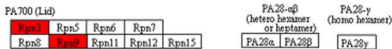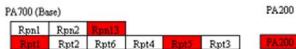

Bacterial regulatory subunit  
(AAA ATPase forming ring-like complex)

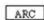

Archaeal regulatory subunit  
(oligomeric complex)

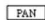

**Core Particles (20S proteasome)**

Standard proteasome subunits

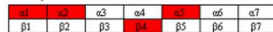

Immunoproteasome subunits

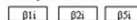

Thymoproteasome subunits

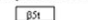

Prokaryotic 20S subunits

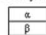

**Formation of immunoproteasomes**

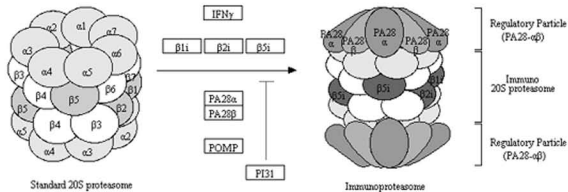

**Supplementary Fig.S3. KEGG pathway enrichment analysis of the ubiquitinated proteins in proteasome.** The ubiquitinated proteins are highlighted in red.

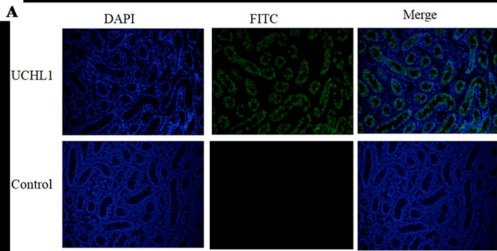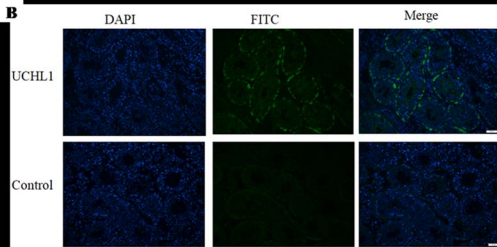

**Supplementary Fig.S4. Immunohistochemical analyses of UCHL1 in pre-puberal (A) and adult (B) buffalo testes.** UCHL1 which is mainly localized in the cytoplasm and membrane of spermatogonia in pre-puberal and adult buffalo testes, while the expression quantity decreased with age. The negative controls were incubated in blocking solution without the primary antibody. Scale bars=100  $\mu$ m.
